# Supplementary material
Source: publisher figshare collection journal article supplement (https://acs.figshare.com/ndownloader/files/4527412)
Supplement: Supplementary file 1 [file 4527412]

# Synthesis and Device Performances of Highly Efficient Fluorene-based Blue Emission Polymers Containing Bulky 9,9-Dialkylfluorene Substitutes

Jae-Kyu Jin,<sup>1</sup> Soon-Ki Kwon<sup>2,\*</sup>, Yun-Hi Kim<sup>2</sup>, Dong-Cheol Shin,<sup>3</sup> Hong You<sup>3</sup> and Hee-Tae Jung<sup>1,\*</sup>

## Supporting Information

### <sup>1</sup>H NMR and <sup>13</sup>C NMR Spectra of Monomers and Polymers

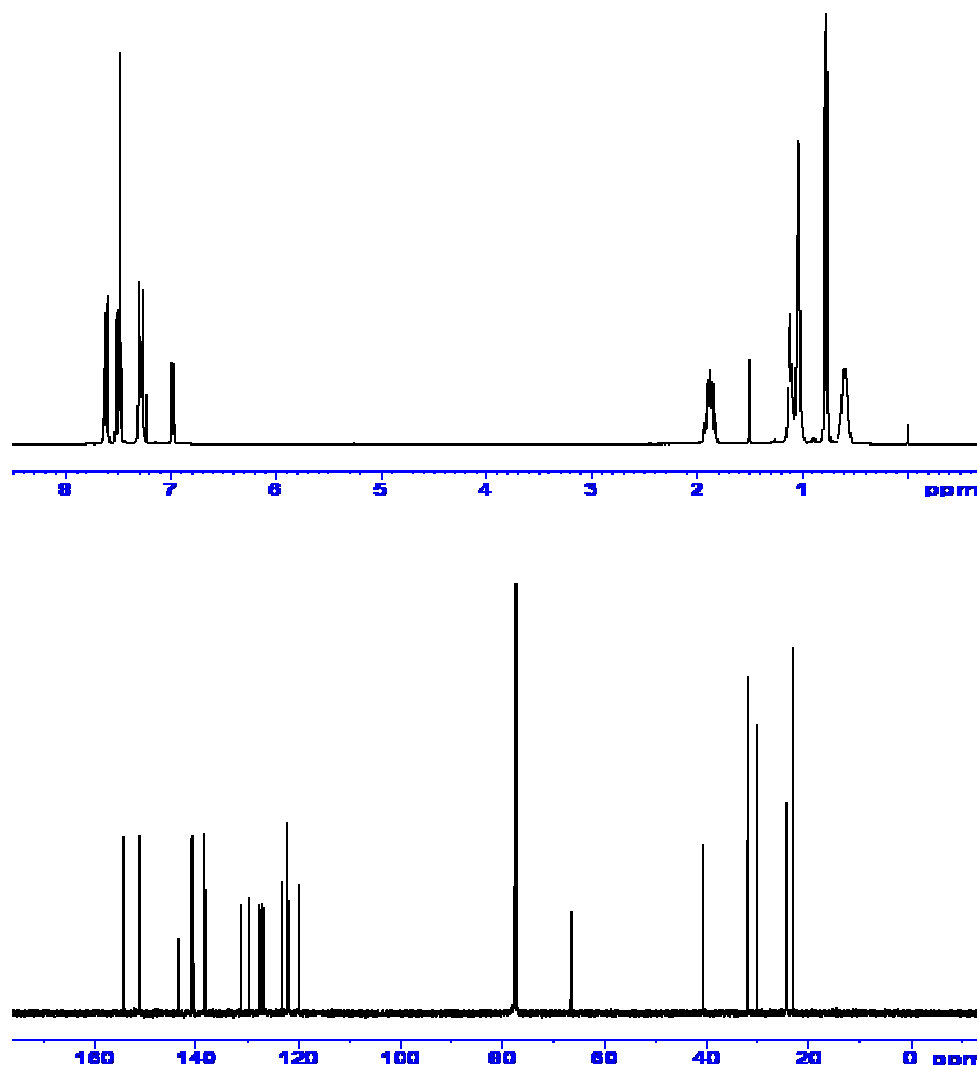

**Figure S1.** <sup>1</sup>H NMR and <sup>13</sup>C NMR Spectra of 9,9-di(9,9-dihexylfluoren-2-yl)-2,7-dibromofluorene (MDFF). (The <sup>1</sup>H NMR peak at 7.2 ppm and 1.5 ppm correspond to chloroform and water, respectively and the <sup>13</sup>C NMR peak at 77.3 ppm correspond to chloroform.)

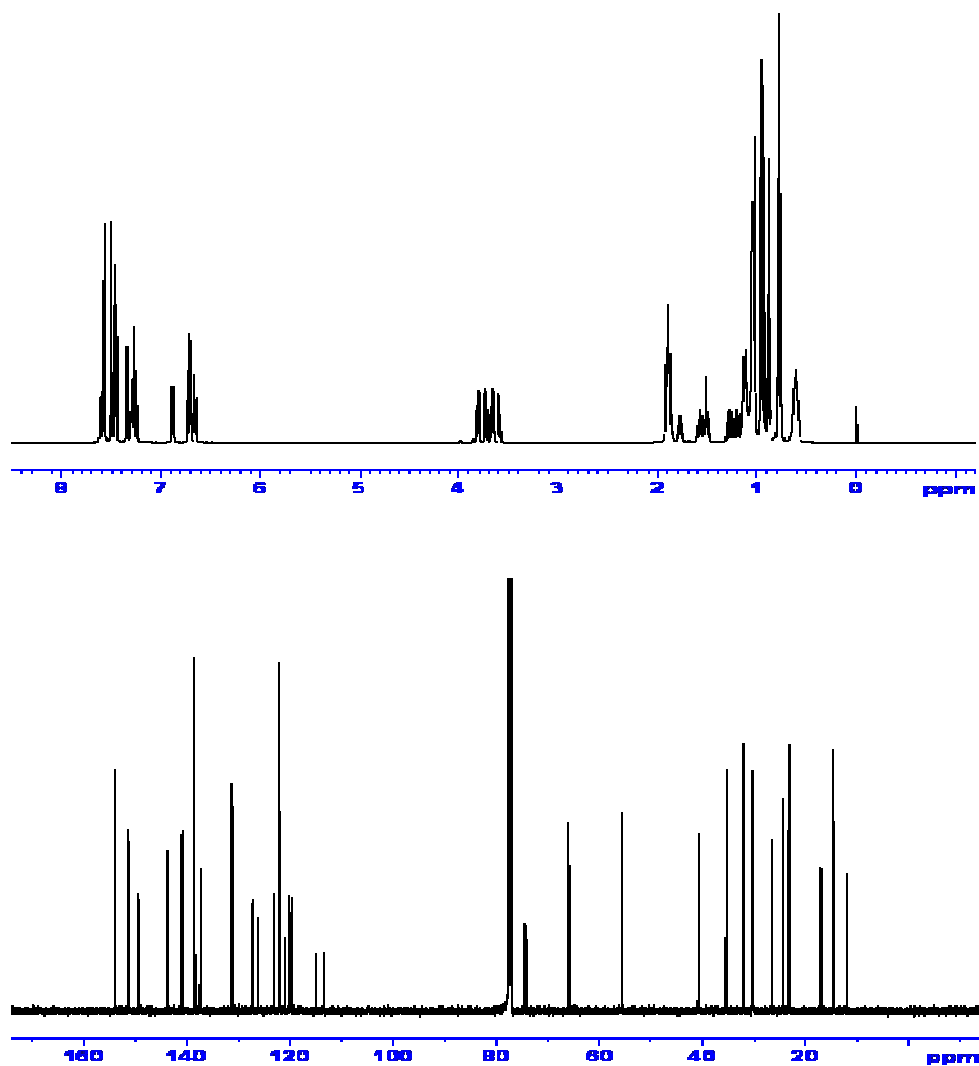

**Figure S2.**  $^1\text{H}$  NMR and  $^{13}\text{C}$  NMR Spectra of 9-(9,9-dihexylfluoren-2-yl)-9-(3,4-di(2-methyl)butyloxyphenyl)-2,7-dibromofluorene (MFCF). (The  $^1\text{H}$  NMR peak at 7.2 ppm and 1.5 ppm correspond to chloroform and water, respectively and the  $^{13}\text{C}$  NMR peak at 77.3 ppm correspond to chloroform.)

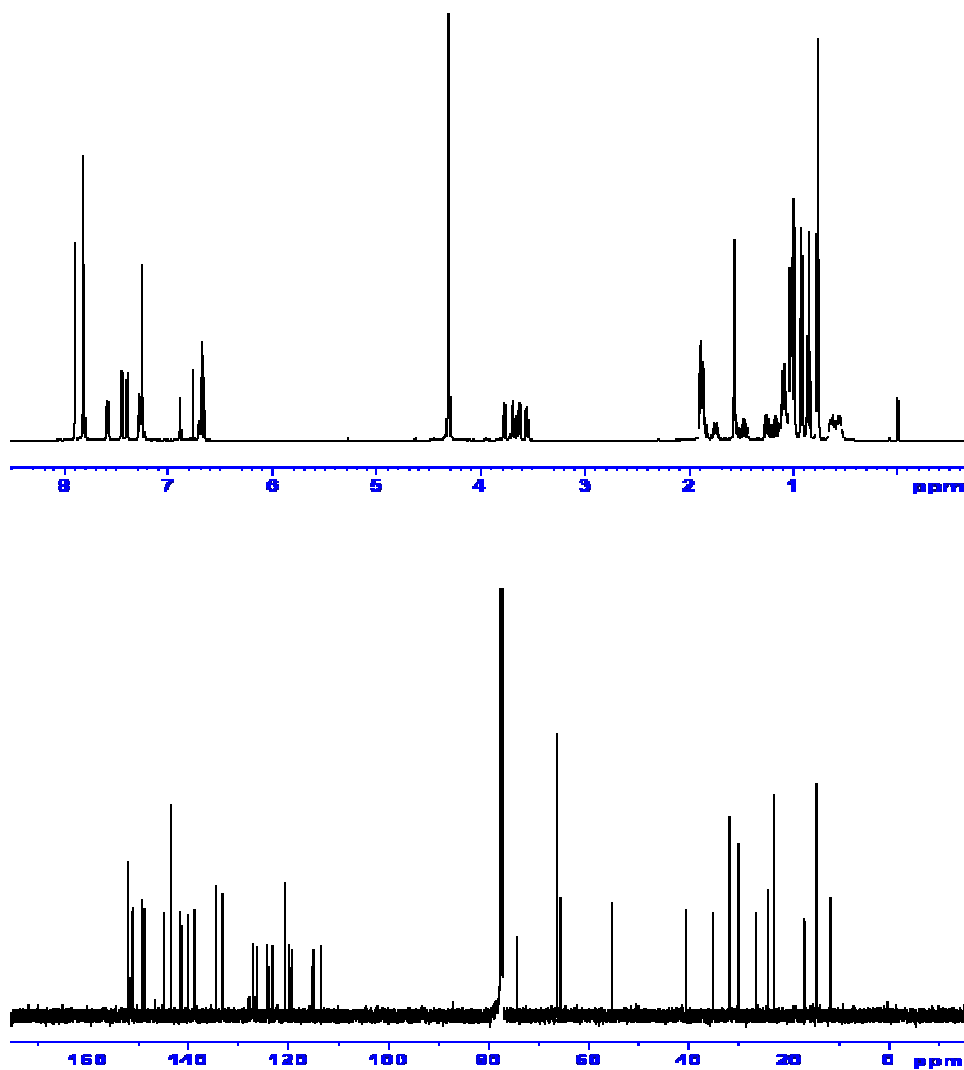

**Figure S3.**  $^1\text{H}$  NMR and  $^{13}\text{C}$  NMR Spectra of 9-(9,9-dihexylfluoren-2-yl)-9-(3,4-di(2-methyl)butyloxyphenyl)fluorene-2,7-bisboronic glycol ester (MFCFB). (The  $^1\text{H}$  NMR peak at 7.2 ppm and 1.5 ppm correspond to chloroform and water, respectively and the  $^{13}\text{C}$  NMR peak at 77.3 ppm correspond to chloroform.)

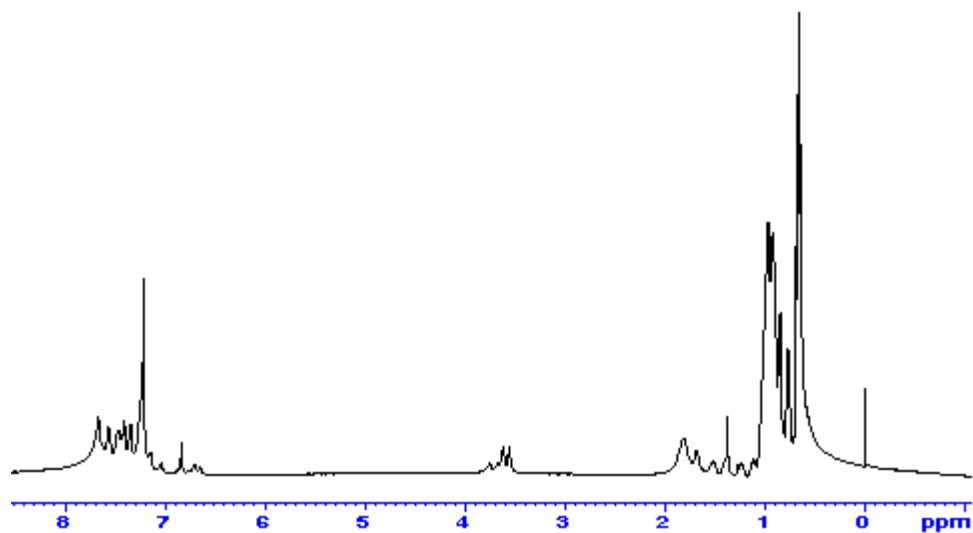

**Figure S4.**  $^1\text{H}$  NMR Spectra of DFF-FCF (The  $^1\text{H}$  NMR peak at 7.2 ppm and 1.5 ppm correspond to chloroform and water, respectively)

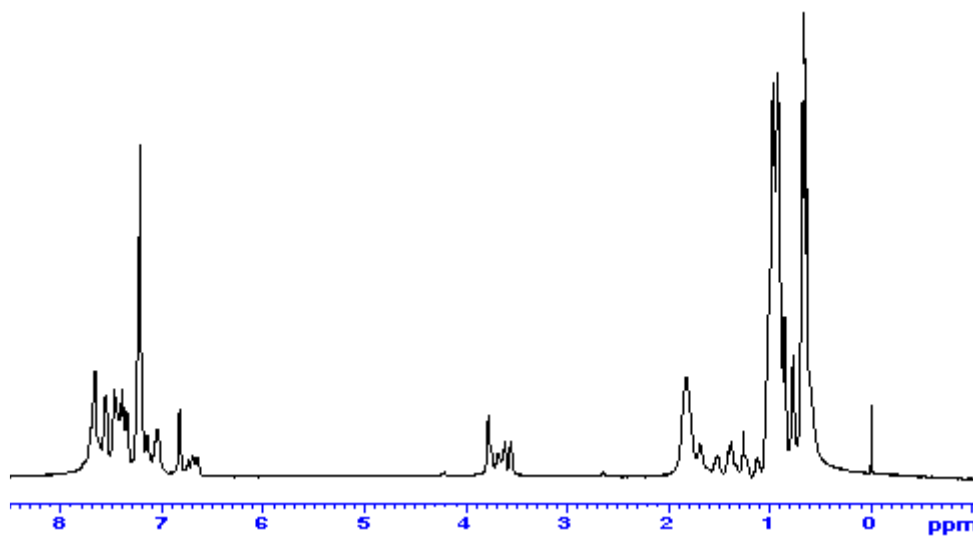

**Figure S5.**  $^1\text{H}$  NMR Spectra of DFF-FCF-TPD (The  $^1\text{H}$  NMR peak at 7.2 ppm and 1.5 ppm correspond to chloroform and water, respectively)
